# Supplementary material
Source: HighWire-hosted journal article supplement (https://heart.bmj.com/content/108/5/345)
Supplement: inline-supplementary-material-1 [file inline-supplementary-material-1.pdf]

## Supplementary table S1

**ICD-10 (International Classification of Diseases, 10th revision) and NOMESCO (Nordic Medico-Statistical Committee) codes used in definitions of co-morbidities and outcomes. Comorbidities were recognized either by ICD-10 diagnoses from hospital stays, or by a combination of hospital diagnoses and drugs dispensed. ATC (Anatomical Therapeutic Chemical system ) codes from NorPD identified disease-specific drugs (e.g. anti-diabetics) and ICD-10 or International Classification for Primary Care 2 (ICPC-2) codes used as reasons for reimbursement of drugs for chronic illnesses for less specific drugs (e.g. beta blockers).**

| Conditions                                                      | ICD-10 code or procedure codes (NOMESCO) from NPR                                                                                                                                                                                                                                                                                                                                                                                                           | ATC code or reimbursement code in NorPD                      |
|-----------------------------------------------------------------|-------------------------------------------------------------------------------------------------------------------------------------------------------------------------------------------------------------------------------------------------------------------------------------------------------------------------------------------------------------------------------------------------------------------------------------------------------------|--------------------------------------------------------------|
| Atrial fibrillation                                             | I48                                                                                                                                                                                                                                                                                                                                                                                                                                                         | Reimbursement code: I48 , K78 (ICPC)                         |
| Additional diagnoses to identify “valvular atrial fibrillation” | ICD10: I050, I052, I342, Z952<br>NOMESCO codes: FKD00, FKA, FMD00,                                                                                                                                                                                                                                                                                                                                                                                          |                                                              |
| Hypertension                                                    | I10, I11, I12, I13, I15                                                                                                                                                                                                                                                                                                                                                                                                                                     | Reimbursement codes: I10-I13, I15 (ICD10) or K86, K87 (ICPC) |
| Chronic kidney disease                                          | N00, N01, N02, N03, N04, N05, N06, N07, N08, N14, N15, N16, N181, N182, N183, N184, N185, N189, N19                                                                                                                                                                                                                                                                                                                                                         |                                                              |
| Ischemic heart disease                                          | I20, I21, I22, I23, I24, I25                                                                                                                                                                                                                                                                                                                                                                                                                                |                                                              |
| Heart failure                                                   | I500, I501, I509                                                                                                                                                                                                                                                                                                                                                                                                                                            | Reimbursement codes: I50 (ICD10) or K77 (ICPC)               |
| Diabetes                                                        | E10, E11, E12, E13                                                                                                                                                                                                                                                                                                                                                                                                                                          | ATC code A10A or A10B                                        |
| Chronic lower respiratory tract disorders                       | J40 – J47                                                                                                                                                                                                                                                                                                                                                                                                                                                   | Reimbursement codes: J44 , J45 (ICD10) or R95 (ICPC)         |
| Active cancer                                                   | C00, C01, C02, C03, C04, C05, C06, C07, C08, C09, C10, C11, C12, C13, C14, C15, C16, C17, C18, C19, C20, C21, C22, C23, C24, C25, C26, C30, C31, C32, C33, C34, C37, C38, C39, C40, C41, C43, C44, C45, C46, C47, C48, C49, C50, C51, C52, C53, C54, C55, C56, C57, C58, C60, C61, C62, C63, C64, C65, C66, C67, C68, C69, C70, C71, C72, C73, C74, C75, C76, C77, C78, C79, C80, C81, C82, C83, C84, C85, C86, C88, C90, C91, C92, C93, C94, C95, C96, C97 |                                                              |
| Thyroid disorders                                               | Hypothyroidism: E010, E011, E012, E018, E030, E031, E032, E033, E034, E035, E038, E039<br>Hyperthyroidism: E050, E051, E052, E053, E054, E055, E058, E059                                                                                                                                                                                                                                                                                                   |                                                              |
| Peripheral artery disease                                       | I70, I71, I72, I73, I74, I77, I78, I79                                                                                                                                                                                                                                                                                                                                                                                                                      |                                                              |
| Inflammatory polyarthropathies                                  | M05 – M14                                                                                                                                                                                                                                                                                                                                                                                                                                                   |                                                              |
| Ischaemic stroke                                                | I630, I631, I632, I633, I634, I635, I636, I638, I639, I64                                                                                                                                                                                                                                                                                                                                                                                                   |                                                              |
| Transient ischaemic attack (TIA)                                | G450, G451, G452, G453, G454, G458, G459, G46                                                                                                                                                                                                                                                                                                                                                                                                               |                                                              |

| Conditions                        | ICD-10 code or procedure codes (NOMESCO) from NPR                                                                                                                                                                                                                                                                                                                                                                  | ATC code or reimbursement code in NorPD |
|-----------------------------------|--------------------------------------------------------------------------------------------------------------------------------------------------------------------------------------------------------------------------------------------------------------------------------------------------------------------------------------------------------------------------------------------------------------------|-----------------------------------------|
| Ischaemic or haemorrhagic stroke  | I600, I601, I602, I603, I604, I605, I606, I607, I608, I609, I610, I611, I612, I613, I614, I615, I616, I618, I619, I620, I621, I629, I630, I631, I632, I633, I634, I635, I636, I638, I639, I64,                                                                                                                                                                                                                     |                                         |
| Major bleeding                    | K920, K921, I600-I609, I610-I619, I620-I629, I230, I312, M250, H431, H356, H313, H450, J942, K661<br><i>Addition: A CRNM-bleeding diagnosis will be converted to a major bleeding diagnose if blood transfusion (NCMP REGG00, RXGG02) is coded within 10 days.</i>                                                                                                                                                 |                                         |
| Systemic embolism                 | I74                                                                                                                                                                                                                                                                                                                                                                                                                |                                         |
| Intracranial bleeding             | I600, I601, I602, I603, I604, I605, I606, I607, I608, I609, I610, I611, I612, I613, I614, I615, I616, I618, I619, I620, I621, I629                                                                                                                                                                                                                                                                                 |                                         |
| Gastrointestinal bleeding         | K920, K921, K922, K250, K252, K254, K256, K260, K262, K264, K266, K270, K272, K274, K276, K280, K282, K284, K286, K625, K228, K221, K290, K528, K625, I850                                                                                                                                                                                                                                                         |                                         |
| CRNM bleeding                     | K922, K250, K252, K254, K256, K260, K262, K264, K266, K270, K272, K274, K276, K280, K282, K284, K286, K625, K228, K221, K290, K528, K625, I850, H113, R040, R041, R042, R048, R049, N836, N837, N920, N921, N922, N923, N924, N925, N926, N930, N938, N939, A985, N421, N857, N921, O721, S064, S065, S066, S068, T140, T141, T142, T143, T144, T145, T146, T147, T148, T149, D683, D698, D699, N02, R31, R58, D62 |                                         |
| Anaemia                           | D50, D51, D52, D53, D55, D56, D57, D58, D59, D60, D61, D62, D63, D64                                                                                                                                                                                                                                                                                                                                               |                                         |
| Alcoholism                        | E244, E52, G312, G621, G721, I426, K70, K860, O354, T51, Z714, Z721                                                                                                                                                                                                                                                                                                                                                |                                         |
| Use of NSAID                      |                                                                                                                                                                                                                                                                                                                                                                                                                    | M01A                                    |
| Use of antiplatelet drugs         |                                                                                                                                                                                                                                                                                                                                                                                                                    | B01A C                                  |
| Use of cholesterol lowering drugs |                                                                                                                                                                                                                                                                                                                                                                                                                    | C10A, C10B                              |

NPR, Norwegian Patient Registry; NorPD, Norwegian Prescription Database; NCMP, Norwegian Classification of Medical Procedures; CRNM bleeding, clinically relevant non-major bleeding; NSAID, non-steroidal anti-inflammatory drug;

## Supplementary table S2; ICD-codes used to calculate risk scores

| CHADS2-VASC |                                                                         |                                                                                                                                             |
|-------------|-------------------------------------------------------------------------|---------------------------------------------------------------------------------------------------------------------------------------------|
| Point       | Condition                                                               | Definition                                                                                                                                  |
| 1           | Heart Failure                                                           | use definition from baseline covariates (Table 1)                                                                                           |
| 1           | Hypertension                                                            | use definition from baseline covariates (Table 1)                                                                                           |
| 1           | Diabetes mellitus                                                       | use definition from baseline covariates (Table 1)                                                                                           |
| 2           | Stroke, TIA or systemic embolism                                        | use definition from baseline covariates (Table 1)                                                                                           |
| 1           | Vascular Disease (myocardial infarction or peripheral arterial disease) | Combined definitions from baseline covariates "Ischaemic Heart Disease" , and "Vascular disease" in table 1.                                |
| 1           | Female gender                                                           |                                                                                                                                             |
| 1           | Age 65-<75 years                                                        |                                                                                                                                             |
| 2           | Age ≥ 75 years                                                          |                                                                                                                                             |
| HAS-BLED    |                                                                         |                                                                                                                                             |
| Point       | Condition                                                               | Definition                                                                                                                                  |
| 1           | Hypertension                                                            | Use definition for "Hypertension" from baseline comorbidities                                                                               |
| 1           | Abnormal kidney function                                                | Use definition for "Chronic kidney disease" from baseline comorbidities                                                                     |
| 1           | Abnormal liver function:                                                | Use definition for "Liver disease" from baseline comorbidities                                                                              |
| 1           | Stroke, TIA                                                             | use definition "History of stroke" from baseline comorbidities                                                                              |
| 1           | Any bleeding other than haemorrhagic stroke                             | Use definition of Major and CRNM bleeding from baseline comorbidities, excluding codes for haemorrhagic stroke I60, I61, I690-I692          |
| N/A         | Labile INR                                                              | Not available                                                                                                                               |
| 1           | Age ≥ 65 years                                                          | 1 point for age 65 years or older                                                                                                           |
| 1           | Alcohol/ Drug Therapy                                                   | Use definition of "Alcoholism" , "Use of NSAIDs last 12 months" and "Use of antiplatelet drugs last 12 months, from baseline comorbidities. |

Values are numbers (percent) unless otherwise specified. TIA, transient ischaemic attack; NSAIDs, non-steroidal anti-inflammatory drugs; INR, International Normalised Ratio; CHA2DS2-VaSc, congestive heart failure (or left ventricular systolic dysfunction), hypertension, age ≥ 75 years, diabetes mellitus, prior stroke or transient ischaemic attack or systemic embolism, vascular disease, age ≥ 65 years, sex category; HAS-BLED, hypertension, abnormal renal function/ abnormal liver function, prior stroke, prior major bleeding, labile international normalised ratio (INR), elderly age ≥ 65 years, prior alcohol or drug abuse / use of medications that predispose to bleeding (antiplatelet agents, NSAIDs).
